# Supplementary material for: Variation in the Content and Composition of Tocols in a Wheat Population
Source: MDPI journal article supplement (doi:10.3390/foods11091343), 2022-05-05
Supplement: s1 [file s1]

**Table S1.** Growing and environmental conditions in Hungary.

| <b>Growing conditions</b> |                                                                                   | <b>2013/2014</b>         | <b>2018/2019</b>         |
|---------------------------|-----------------------------------------------------------------------------------|--------------------------|--------------------------|
| <b>Location</b>           | geographic coordinates                                                            | 47°3'N, 18°8'E           | 47°18'N, 18°47'E         |
|                           | altitude                                                                          | 115 m                    | 115 m                    |
| <b>Growing parameters</b> | previous crop:                                                                    | oilseed radish           | oilseed radish           |
|                           | sowing density                                                                    | 550 seeds/m <sup>2</sup> | 550 seeds/m <sup>2</sup> |
| <b>Soil parameters</b>    | soil type                                                                         | chernozem                | chernozem                |
|                           | pH (KCl)                                                                          | 7.25                     | 7.25                     |
|                           | humus (m/m%)                                                                      | 2.8                      | 2.8                      |
|                           | P <sub>2</sub> O <sub>5</sub> (mg/kg)                                             | 210                      | 210                      |
|                           | K <sub>2</sub> O (mg/kg)                                                          | 210                      | 210                      |
|                           | yearly average N input through NPK combined fertilizer (active ingredient, kg/ha) | 120                      | 120                      |

**Table S2.** Meteorological conditions in Hungary.

|                      |                                                             | <b>2013/2014</b> | <b>2018/2019</b> |
|----------------------|-------------------------------------------------------------|------------------|------------------|
| <b>full season</b>   | Growing period (days)                                       | 268              | 279              |
|                      | Cumulative precipitation (mm)                               | 348.9            | 365.6            |
|                      | Mean temperature (°C)                                       | 10.44            | 9.3              |
|                      | Absolute min temperature (°C)                               | -11.8            | -14.4            |
|                      | Absolute max temperature (°C)                               | 33.8             | 36.0             |
| <b>last 100 days</b> | Cum. precipitation in the last 100 days before harvest (mm) | 202.6            | 225.0            |
|                      | Mean temperature in the last 100 days (°C)                  | 18.33            | 17.1             |
|                      | Absolute min temp in the last 100 days (°C)                 | 2.6              | -0.7             |
|                      | Absolute max temp in the last 100 days (°C)                 | 33.8             | 36.0             |
| <b>abs. min-max</b>  | No of days with Tmin ≤ 0 °C                                 | 71               | 90               |
|                      | No of days with Tmin ≤ -10 °C                               | 1                | 6                |
|                      | No of days with Tmax ≥ 25 °C                                | 54               | 42               |
|                      | No of days with Tmax ≥ 30 °C                                | 18               | 16               |
|                      | No of days with Tmax ≥ 35 °C                                | 0                | 1                |

**Table S3.** Average of the compositional traits in the individual lines (2014, 2019).

| Line       | Year | AT   | ATT  | BT   | BTT   | GT   | total<br>tocol | TKW   | Group |
|------------|------|------|------|------|-------|------|----------------|-------|-------|
|            |      | ug/g | ug/g | ug/g | ug/g  | ug/g | ug/g           | g     |       |
| MV-TOBORZO | 2014 | 5,50 | 2,53 | 2,23 | 8,04  | 0,38 | 18,67          | 55,96 | 5     |
| MV-TOBORZO | 2019 | 4,98 | 2,00 | 3,35 | 14,18 | 0,12 | 24,63          | 49,10 | 5     |
| TOMMI      | 2014 | 6,12 | 3,64 | 2,75 | 17,82 | 0,10 | 30,42          | 42,03 | 1     |
| TOMMI      | 2019 | 6,04 | 2,52 | 4,32 | 23,22 | 0,20 | 36,31          | 31,90 | 1     |
| TT1        | 2019 | 6,17 | 3,51 | 4,45 | 25,13 | 0,18 | 39,43          | 34,88 | 1     |
| TT2        | 2019 | 7,32 | 2,71 | 4,80 | 22,09 | 0,16 | 37,08          | 35,87 | 1     |
| TT3        | 2019 | 6,81 | 2,70 | 5,15 | 28,61 | 0,10 | 43,38          | 41,17 | 1     |
| TT4        | 2019 | 7,51 | 2,53 | 5,23 | 21,57 | 0,12 | 36,97          | 42,02 | 3     |
| TT5        | 2019 | 6,34 | 2,57 | 4,74 | 22,18 | 0,16 | 35,99          | 41,44 | 3     |
| TT6        | 2019 | 5,48 | 3,10 | 3,29 | 28,94 | 0,11 | 40,92          | 38,13 | 1     |
| TT7        | 2019 | 6,59 | 2,83 | 4,83 | 25,34 | 0,14 | 39,74          | 42,65 | 3     |
| TT8        | 2019 | 6,80 | 2,51 | 4,53 | 24,79 | 0,14 | 38,76          | 44,70 | 3     |
| TT9        | 2019 | 5,76 | 2,92 | 3,82 | 22,24 | 0,14 | 34,88          | 38,07 | 2     |
| TT10       | 2019 | 6,01 | 1,88 | 4,30 | 19,52 | 0,13 | 31,85          | 47,68 | 4     |
| TT11       | 2019 | 7,18 | 1,85 | 5,15 | 18,02 | 0,11 | 32,32          | 45,44 | 4     |
| TT12       | 2019 | 7,58 | 3,03 | 4,97 | 27,34 | 0,10 | 43,03          | 42,22 | 1     |
| TT13       | 2019 | 5,87 | 2,48 | 3,83 | 23,03 | 0,09 | 35,29          | 46,91 | 4     |
| TT14       | 2019 | 5,87 | 2,22 | 3,73 | 15,04 | 0,10 | 26,95          | 53,47 | 5     |
| TT15       | 2019 | 7,33 | 2,99 | 4,96 | 24,02 | 0,10 | 39,41          | 35,23 | 1     |
| TT16       | 2019 | 6,08 | 3,03 | 4,39 | 26,29 | 0,11 | 39,89          | 42,51 | 3     |
| TT17       | 2019 | 5,52 | 2,49 | 3,59 | 19,17 | 0,09 | 30,86          | 41,95 | 4     |
| TT18       | 2019 | 5,91 | 2,39 | 4,60 | 18,73 | 0,14 | 31,78          | 38,25 | 2     |
| TT19       | 2019 | 5,72 | 1,70 | 3,71 | 18,36 | 0,11 | 29,60          | 47,87 | 4     |
| TT20       | 2019 | 6,68 | 2,34 | 5,07 | 20,71 | 0,13 | 34,94          | 45,88 | 3     |
| TT21       | 2019 | 6,94 | 3,34 | 4,59 | 25,01 | 0,12 | 40,01          | 30,70 | 1     |
| TT22       | 2019 | 6,48 | 2,56 | 3,75 | 22,77 | 0,12 | 35,69          | 40,27 | 3     |
| TT23       | 2019 | 5,36 | 2,06 | 3,66 | 19,59 | 0,13 | 30,81          | 45,80 | 4     |
| TT24       | 2019 | 6,58 | 2,88 | 3,83 | 21,23 | 0,09 | 34,61          | 42,95 | 3     |
| TT25       | 2019 | 6,33 | 2,27 | 4,14 | 19,00 | 0,07 | 31,81          | 40,89 | 4     |
| TT26       | 2019 | 6,45 | 2,63 | 4,71 | 26,14 | 0,10 | 40,02          | 43,89 | 3     |
| TT27       | 2019 | 5,51 | 2,26 | 4,22 | 21,16 | 0,09 | 33,24          | 42,06 | 3     |
| TT28       | 2019 | 5,60 | 2,19 | 3,92 | 21,30 | 0,09 | 33,10          | 46,09 | 3     |
| TT29       | 2019 | 6,61 | 3,35 | 4,16 | 26,87 | 0,14 | 41,14          | 34,99 | 1     |
| TT30       | 2019 | 6,63 | 2,42 | 4,08 | 18,25 | 0,15 | 31,54          | 53,26 | 4     |
| TT31       | 2019 | 5,09 | 2,21 | 3,23 | 16,71 | 0,17 | 27,41          | 46,68 | 5     |
| TT32       | 2019 | 7,68 | 3,25 | 4,89 | 26,51 | 0,15 | 42,49          | 38,00 | 1     |
| TT33       | 2019 | 7,40 | 3,48 | 5,33 | 25,26 | 0,11 | 41,58          | 36,08 | 1     |
| TT34       | 2019 | 7,31 | 2,37 | 3,66 | 17,09 | 0,15 | 30,57          | 46,66 | 5     |
| TT35       | 2019 | 5,26 | 2,76 | 3,46 | 26,31 | 0,12 | 37,90          | 38,30 | 3     |
| TT36       | 2019 | 5,36 | 2,50 | 3,87 | 21,31 | 0,11 | 33,15          | 40,94 | 4     |
| TT37       | 2019 | 5,01 | 2,12 | 3,09 | 16,80 | 0,08 | 27,09          | 49,04 | 5     |

|      |      |      |      |      |       |      |       |       |   |
|------|------|------|------|------|-------|------|-------|-------|---|
| TT38 | 2019 | 4,85 | 2,01 | 3,16 | 21,72 | 0,07 | 31,81 | 41,48 | 4 |
| TT39 | 2019 | 6,57 | 2,97 | 5,29 | 26,74 | 0,14 | 41,70 | 42,61 | 1 |
| TT40 | 2019 | 6,53 | 3,18 | 5,04 | 25,34 | 0,14 | 40,23 | 36,01 | 1 |
| TT41 | 2019 | 6,56 | 2,47 | 4,96 | 25,66 | 0,12 | 39,76 | 43,30 | 3 |
| TT42 | 2019 | 5,82 | 3,88 | 3,73 | 27,03 | 0,19 | 40,65 | 34,08 | 2 |
| TT43 | 2019 | 7,66 | 2,02 | 4,90 | 18,22 | 0,15 | 32,95 | 47,84 | 4 |
| TT44 | 2019 | 6,39 | 2,33 | 4,41 | 21,21 | 0,12 | 34,46 | 45,52 | 4 |
| TT45 | 2019 | 6,08 | 2,93 | 4,05 | 25,02 | 0,14 | 38,23 | 40,51 | 1 |
| TT46 | 2019 | 6,71 | 2,99 | 4,26 | 25,08 | 0,09 | 39,14 | 44,89 | 4 |
| TT47 | 2019 | 5,26 | 2,68 | 3,95 | 22,31 | 0,11 | 34,32 | 46,18 | 4 |
| TT48 | 2019 | 6,08 | 3,22 | 3,88 | 28,85 | 0,11 | 42,13 | 38,86 | 1 |
| TT49 | 2019 | 6,73 | 3,00 | 4,82 | 27,96 | 0,14 | 42,64 | 35,16 | 1 |
| TT50 | 2019 | 5,76 | 2,04 | 4,42 | 24,21 | 0,13 | 36,57 | 39,34 | 3 |
| TT51 | 2019 | 5,77 | 3,23 | 4,21 | 27,21 | 0,21 | 40,63 | 33,42 | 1 |
| TT52 | 2019 | 6,99 | 2,40 | 4,56 | 17,73 | 0,10 | 31,77 | 47,89 | 4 |
| TT53 | 2019 | 5,70 | 2,41 | 3,70 | 20,61 | 0,14 | 32,57 | 35,14 | 2 |
| TT54 | 2019 | 8,05 | 2,29 | 5,09 | 25,45 | 0,12 | 41,00 | 44,59 | 3 |
| TT55 | 2019 | 6,29 | 2,12 | 4,13 | 23,46 | 0,12 | 36,12 | 43,51 | 3 |
| TT56 | 2019 | 6,05 | 2,36 | 4,09 | 23,48 | 0,11 | 36,09 | 45,62 | 4 |
| TT57 | 2019 | 5,53 | 2,03 | 4,21 | 20,73 | 0,09 | 32,60 | 47,94 | 4 |
| TT58 | 2019 | 5,65 | 2,55 | 4,14 | 24,19 | 0,09 | 36,62 | 39,14 | 3 |
| TT59 | 2019 | 5,21 | 2,10 | 4,04 | 17,23 | 0,10 | 28,67 | 44,58 | 5 |
| TT60 | 2019 | 6,08 | 2,53 | 4,19 | 21,34 | 0,11 | 34,25 | 48,68 | 4 |
| TT61 | 2019 | 6,63 | 2,45 | 4,23 | 21,81 | 0,10 | 35,22 | 40,17 | 3 |
| TT62 | 2019 | 6,58 | 2,28 | 4,95 | 22,70 | 0,11 | 36,62 | 40,91 | 4 |
| TT63 | 2019 | 5,52 | 2,71 | 3,72 | 19,93 | 0,12 | 31,99 | 34,76 | 2 |
| TT64 | 2019 | 6,50 | 2,10 | 4,46 | 20,51 | 0,11 | 33,68 | 47,18 | 4 |
| TT65 | 2019 | 6,17 | 1,86 | 4,90 | 16,82 | 0,11 | 29,87 | 41,13 | 4 |
| TT66 | 2019 | 6,24 | 1,96 | 4,29 | 18,08 | 0,13 | 30,70 | 38,99 | 2 |
| TT67 | 2019 | 5,27 | 1,86 | 3,37 | 21,46 | 0,09 | 32,05 | 40,61 | 4 |
| TT68 | 2019 | 5,37 | 1,89 | 3,83 | 18,72 | 0,11 | 29,93 | 42,06 | 4 |
| TT69 | 2019 | 6,50 | 2,50 | 4,10 | 24,76 | 0,16 | 38,03 | 36,90 | 2 |
| TT70 | 2019 | 7,69 | 2,36 | 5,11 | 15,94 | 0,17 | 31,28 | 45,79 | 4 |
| TT71 | 2019 | 5,82 | 2,16 | 3,59 | 22,32 | 0,10 | 33,98 | 44,83 | 4 |
| TT72 | 2019 | 6,40 | 1,81 | 4,87 | 15,20 | 0,19 | 28,48 | 45,61 | 5 |
| TT73 | 2019 | 8,27 | 3,00 | 5,62 | 28,17 | 0,12 | 45,18 | 40,56 | 3 |
| TT74 | 2019 | 6,57 | 3,47 | 4,64 | 23,82 | 0,16 | 38,66 | 41,21 | 4 |
| TT75 | 2019 | 8,39 | 2,32 | 5,51 | 22,71 | 0,14 | 39,07 | 38,57 | 3 |
| TT76 | 2019 | 7,50 | 3,34 | 4,75 | 26,91 | 0,13 | 42,62 | 33,80 | 1 |
| TT77 | 2019 | 7,29 | 2,42 | 5,29 | 25,31 | 0,10 | 40,40 | 43,34 | 3 |
| TT78 | 2019 | 5,09 | 2,85 | 3,89 | 27,95 | 0,08 | 39,86 | 40,20 | 1 |
| TT79 | 2019 | 7,07 | 2,67 | 5,64 | 21,79 | 0,13 | 37,30 | 39,90 | 3 |
| TT80 | 2019 | 7,01 | 2,72 | 4,61 | 24,60 | 0,09 | 39,03 | 40,11 | 3 |
| TT81 | 2019 | 6,59 | 2,24 | 4,09 | 22,82 | 0,08 | 35,83 | 39,36 | 3 |
| TT82 | 2019 | 7,30 | 3,87 | 5,19 | 25,57 | 0,11 | 42,05 | 37,61 | 3 |
| TT83 | 2019 | 6,53 | 2,54 | 4,63 | 19,45 | 0,15 | 33,29 | 37,68 | 4 |

|       |      |      |      |      |       |      |       |       |   |
|-------|------|------|------|------|-------|------|-------|-------|---|
| TT84  | 2019 | 7,33 | 2,64 | 4,56 | 22,53 | 0,13 | 37,20 | 39,21 | 3 |
| TT85  | 2019 | 7,16 | 2,13 | 4,34 | 21,32 | 0,10 | 35,05 | 43,78 | 3 |
| TT86  | 2019 | 5,24 | 1,75 | 4,16 | 16,86 | 0,11 | 28,12 | 37,82 | 2 |
| TT87  | 2019 | 6,58 | 2,99 | 4,53 | 21,64 | 0,13 | 35,86 | 33,99 | 1 |
| TT88  | 2019 | 7,48 | 2,81 | 4,76 | 21,33 | 0,15 | 36,53 | 31,27 | 1 |
| TT89  | 2019 | 6,12 | 2,86 | 4,38 | 23,58 | 0,08 | 37,03 | 44,19 | 4 |
| TT90  | 2019 | 6,41 | 2,32 | 4,41 | 21,36 | 0,19 | 34,70 | 47,27 | 4 |
| TT91  | 2019 | 6,58 | 3,45 | 4,23 | 24,35 | 0,14 | 38,75 | 32,32 | 1 |
| TT92  | 2019 | 6,10 | 2,46 | 4,03 | 21,68 | 0,13 | 34,40 | 38,71 | 4 |
| TT93  | 2019 | 6,55 | 3,50 | 4,92 | 23,42 | 0,19 | 38,58 | 38,81 | 3 |
| TT94  | 2019 | 7,26 | 2,39 | 4,81 | 21,02 | 0,18 | 35,66 | 44,97 | 4 |
| TT95  | 2019 | 5,71 | 2,52 | 3,48 | 20,20 | 0,10 | 32,02 | 39,81 | 4 |
| TT96  | 2019 | 5,59 | 1,86 | 3,95 | 17,19 | 0,14 | 28,71 | 46,27 | 5 |
| TT97  | 2019 | 6,54 | 2,42 | 4,69 | 21,50 | 0,15 | 35,30 | 39,78 | 3 |
| TT98  | 2019 | 5,36 | 2,56 | 3,29 | 18,67 | 0,06 | 29,93 | 45,35 | 5 |
| TT99  | 2019 | 4,07 | 2,18 | 2,94 | 20,32 | 0,11 | 29,62 | 44,94 | 4 |
| TT100 | 2019 | 5,93 | 2,08 | 4,28 | 17,99 | 0,13 | 30,42 | 36,25 | 2 |
| TT101 | 2019 | 5,88 | 2,49 | 3,92 | 16,30 | 0,43 | 29,02 | 33,51 | 2 |
| TT102 | 2019 | 4,68 | 1,51 | 3,02 | 15,24 | 0,35 | 24,80 | 44,44 | 5 |
| TT103 | 2019 | 4,80 | 1,67 | 3,13 | 15,57 | 0,33 | 25,50 | 39,89 | 2 |
| TT104 | 2019 | 4,65 | 1,75 | 3,40 | 15,09 | 0,37 | 25,27 | 31,85 | 2 |
| TT105 | 2019 | 3,90 | 1,88 | 2,92 | 16,32 | 0,28 | 25,32 | 37,53 | 2 |
| TT106 | 2019 | 3,93 | 1,88 | 2,54 | 16,99 | 0,22 | 25,57 | 36,17 | 2 |
| TT107 | 2019 | 4,51 | 2,11 | 3,06 | 18,24 | 0,33 | 28,26 | 40,11 | 4 |
| TT108 | 2019 | 4,93 | 1,98 | 3,55 | 16,90 | 0,38 | 27,74 | 44,45 | 4 |
| TT109 | 2019 | 4,56 | 1,41 | 2,73 | 12,58 | 0,29 | 21,57 | 47,34 | 5 |
| TT110 | 2019 | 4,63 | 1,76 | 2,87 | 15,56 | 0,30 | 25,12 | 45,46 | 4 |
| TT111 | 2019 | 5,45 | 1,84 | 3,86 | 18,19 | 0,41 | 29,74 | 35,55 | 2 |
| TT112 | 2019 | 4,34 | 1,91 | 3,27 | 16,52 | 0,34 | 26,38 | 38,92 | 2 |
| TT113 | 2019 | 4,82 | 2,00 | 3,67 | 18,89 | 0,27 | 29,65 | 43,44 | 4 |
| TT115 | 2019 | 4,96 | 2,10 | 3,77 | 19,24 | 0,31 | 30,38 | 35,30 | 2 |
| TT116 | 2019 | 5,41 | 1,48 | 3,66 | 13,58 | 0,29 | 24,42 | 37,71 | 4 |
| TT117 | 2019 | 4,34 | 1,92 | 2,67 | 16,40 | 0,18 | 25,50 | 36,07 | 2 |
| TT118 | 2019 | 5,54 | 2,06 | 3,46 | 18,69 | 0,25 | 29,99 | 39,20 | 2 |
| TT119 | 2019 | 5,13 | 1,85 | 3,44 | 15,30 | 0,29 | 26,00 | 35,42 | 2 |
| TT120 | 2019 | 4,99 | 1,44 | 3,26 | 15,55 | 0,24 | 25,48 | 42,58 | 2 |
| TT121 | 2019 | 4,30 | 1,86 | 2,84 | 17,54 | 0,20 | 26,74 | 41,97 | 5 |
| TT122 | 2019 | 5,54 | 1,87 | 3,61 | 19,35 | 0,32 | 30,69 | 29,71 | 1 |
| TT123 | 2019 | 4,70 | 1,82 | 3,40 | 16,37 | 0,22 | 26,51 | 44,58 | 5 |
| TT124 | 2019 | 4,22 | 1,39 | 3,15 | 15,25 | 0,22 | 24,23 | 40,47 | 5 |
| TT125 | 2019 | 4,72 | 2,00 | 3,37 | 18,90 | 0,26 | 29,24 | 33,34 | 2 |
| TT126 | 2019 | 5,63 | 1,35 | 3,86 | 15,24 | 0,37 | 26,45 | 34,12 | 2 |
| TT127 | 2019 | 5,37 | 1,50 | 3,30 | 14,17 | 0,22 | 24,56 | 50,17 | 5 |
| TT128 | 2019 | 5,02 | 2,08 | 3,37 | 19,68 | 0,24 | 30,39 | 38,39 | 2 |
| TT129 | 2019 | 4,76 | 1,49 | 2,98 | 14,20 | 0,20 | 23,62 | 50,42 | 5 |
| TT130 | 2019 | 5,05 | 2,08 | 3,22 | 17,21 | 0,27 | 27,84 | 34,40 | 2 |

|       |      |      |      |      |       |      |       |       |   |
|-------|------|------|------|------|-------|------|-------|-------|---|
| TT131 | 2019 | 4,28 | 1,77 | 1,84 | 14,88 | 0,19 | 22,95 | 33,99 | 2 |
| TT132 | 2019 | 4,51 | 2,21 | 2,97 | 18,21 | 0,19 | 28,09 | 37,18 | 2 |
| TT133 | 2019 | 4,34 | 1,80 | 2,67 | 15,35 | 0,18 | 24,34 | 42,37 | 5 |
| TT134 | 2019 | 5,09 | 1,86 | 3,58 | 17,64 | 0,23 | 28,40 | 37,13 | 2 |
| TT135 | 2019 | 5,44 | 2,56 | 3,37 | 17,89 | 0,22 | 29,48 | 29,52 | 2 |
| TT136 | 2019 | 5,40 | 2,01 | 3,60 | 17,88 | 0,18 | 29,07 | 36,92 | 4 |
| TT137 | 2019 | 5,17 | 2,29 | 3,43 | 18,00 | 0,15 | 29,04 | 30,22 | 2 |
| TT138 | 2019 | 4,51 | 1,94 | 3,37 | 18,56 | 0,23 | 28,61 | 29,86 | 2 |
| TT139 | 2019 | 4,49 | 1,64 | 3,13 | 15,98 | 0,15 | 25,39 | 43,77 | 5 |
| TT140 | 2019 | 5,49 | 1,55 | 3,90 | 16,72 | 0,21 | 27,87 | 43,86 | 4 |
| TT141 | 2019 | 4,84 | 1,48 | 3,49 | 15,45 | 0,20 | 25,47 | 37,49 | 2 |
| TT142 | 2019 | 4,20 | 1,64 | 2,91 | 13,96 | 0,19 | 22,89 | 47,80 | 5 |
| TT143 | 2019 | 3,89 | 1,38 | 2,57 | 15,11 | 0,14 | 23,09 | 45,28 | 5 |
| TT144 | 2019 | 5,58 | 1,66 | 3,53 | 16,68 | 0,16 | 27,60 | 49,07 | 5 |
| TT145 | 2019 | 4,80 | 1,46 | 2,91 | 14,51 | 0,13 | 23,80 | 47,55 | 5 |
| TT146 | 2019 | 3,62 | 1,19 | 2,51 | 11,54 | 0,14 | 19,00 | 51,16 | 5 |
| TT147 | 2019 | 5,13 | 2,26 | 3,79 | 18,50 | 0,21 | 29,89 | 34,08 | 2 |
| TT148 | 2019 | 4,19 | 1,07 | 4,10 | 12,56 | 0,19 | 22,12 | 46,78 | 5 |
| TT149 | 2019 | 5,46 | 1,55 | 3,29 | 13,53 | 0,20 | 24,03 | 45,25 | 5 |
| TT150 | 2019 | 4,46 | 1,57 | 2,86 | 11,62 | 0,10 | 20,62 | 52,04 | 5 |
| TT151 | 2019 | 4,65 | 1,93 | 2,82 | 18,85 | 0,11 | 28,36 | 35,48 | 2 |
| TT152 | 2019 | 5,55 | 1,53 | 4,06 | 17,62 | 0,13 | 28,88 | 42,70 | 4 |
| TT153 | 2019 | 4,64 | 2,10 | 2,95 | 17,85 | 0,11 | 27,65 | 40,58 | 4 |
| TT154 | 2019 | 5,12 | 1,81 | 3,72 | 17,72 | 0,12 | 28,48 | 37,50 | 4 |
| TT155 | 2019 | 4,87 | 1,82 | 3,15 | 16,31 | 0,13 | 26,28 | 35,49 | 2 |
| TT156 | 2019 | 4,52 | 2,01 | 2,75 | 16,02 | 0,13 | 25,43 | 39,38 | 4 |
| TT157 | 2019 | 5,10 | 2,26 | 3,03 | 19,00 | 0,11 | 29,51 | 39,19 | 4 |
| TT158 | 2019 | 4,36 | 1,48 | 2,71 | 13,20 | 0,12 | 21,87 | 42,36 | 5 |
| TT159 | 2019 | 5,96 | 2,28 | 3,89 | 20,28 | 0,11 | 32,52 | 42,18 | 4 |
| TT160 | 2019 | 5,15 | 1,95 | 3,25 | 16,92 | 0,13 | 27,40 | 40,96 | 2 |
| TT161 | 2019 | 5,75 | 1,96 | 3,90 | 17,55 | 0,15 | 29,30 | 42,78 | 4 |
| TT162 | 2019 | 5,53 | 1,94 | 3,81 | 19,06 | 0,15 | 30,49 | 36,78 | 2 |
| TT163 | 2019 | 4,40 | 2,01 | 2,79 | 14,35 | 0,12 | 23,67 | 36,01 | 2 |
| TT164 | 2019 | 4,37 | 1,76 | 2,84 | 16,99 | 0,11 | 26,07 | 42,20 | 5 |
| TT165 | 2019 | 4,79 | 1,83 | 3,67 | 15,56 | 0,11 | 25,96 | 44,96 | 4 |
| TT166 | 2019 | 4,43 | 2,23 | 2,54 | 17,02 | 0,10 | 26,32 | 27,24 | 2 |
| TT167 | 2019 | 5,99 | 2,50 | 3,97 | 20,74 | 0,14 | 33,35 | 30,33 | 1 |
| TT168 | 2019 | 5,04 | 1,68 | 3,59 | 17,09 | 0,09 | 27,49 | 39,80 | 2 |
| TT169 | 2019 | 5,53 | 1,64 | 3,35 | 17,85 | 0,10 | 28,46 | 39,27 | 4 |
| TT170 | 2019 | 4,17 | 1,26 | 2,84 | 11,55 | 0,07 | 19,89 | 48,50 | 5 |
| TT171 | 2019 | 4,83 | 2,18 | 3,28 | 21,89 | 0,10 | 32,28 | 33,19 | 2 |
| TT172 | 2019 | 4,24 | 1,82 | 3,33 | 13,04 | 0,09 | 22,52 | 28,57 | 2 |
| TT173 | 2019 | 4,81 | 1,90 | 2,75 | 16,52 | 0,10 | 26,08 | 40,13 | 5 |
| TT174 | 2019 | 5,52 | 2,38 | 3,28 | 19,62 | 0,13 | 30,94 | 31,69 | 1 |
| TT175 | 2019 | 5,39 | 1,50 | 3,48 | 12,35 | 0,11 | 22,83 | 50,11 | 5 |
| TT176 | 2019 | 5,09 | 1,51 | 3,52 | 14,81 | 0,10 | 25,04 | 48,22 | 5 |

|       |      |      |      |      |       |      |       |       |   |
|-------|------|------|------|------|-------|------|-------|-------|---|
| TT177 | 2019 | 4,37 | 1,48 | 3,28 | 13,72 | 0,12 | 22,96 | 41,76 | 5 |
| TT178 | 2019 | 4,69 | 1,67 | 3,93 | 18,61 | 0,10 | 29,00 | 39,39 | 4 |
| TT179 | 2019 | 5,37 | 2,26 | 3,37 | 16,79 | 0,14 | 27,92 | 30,19 | 2 |
| TT180 | 2019 | 5,18 | 1,75 | 3,25 | 16,16 | 0,14 | 26,49 | 43,92 | 5 |
| TT181 | 2019 | 4,89 | 1,76 | 3,48 | 15,03 | 0,14 | 25,30 | 47,91 | 5 |
| TT182 | 2019 | 4,88 | 2,49 | 3,41 | 20,25 | 0,14 | 31,17 | 29,27 | 1 |
| TT183 | 2019 | 4,74 | 1,77 | 3,21 | 16,46 | 0,12 | 26,30 | 42,06 | 4 |
| TT184 | 2019 | 4,89 | 1,78 | 3,10 | 14,20 | 0,11 | 24,07 | 45,89 | 5 |
| TT185 | 2019 | 5,42 | 1,50 | 4,12 | 14,99 | 0,17 | 26,20 | 42,73 | 4 |
| TT186 | 2019 | 4,79 | 1,62 | 3,48 | 17,42 | 0,11 | 27,41 | 50,37 | 4 |
| TT187 | 2019 | 4,24 | 1,63 | 3,26 | 18,59 | 0,12 | 27,84 | 37,02 | 2 |
| TT188 | 2019 | 5,34 | 1,63 | 3,43 | 15,90 | 0,09 | 26,39 | 46,61 | 4 |
| TT189 | 2019 | 4,09 | 2,03 | 3,10 | 17,02 | 0,11 | 26,35 | 40,12 | 4 |
| TT190 | 2019 | 4,88 | 2,31 | 3,16 | 18,98 | 0,11 | 29,44 | 35,02 | 2 |
| TT191 | 2019 | 3,74 | 1,91 | 2,65 | 17,41 | 0,12 | 25,81 | 38,22 | 2 |
| TT192 | 2019 | 4,73 | 1,65 | 3,40 | 15,58 | 0,10 | 25,46 | 40,12 | 2 |
| TT193 | 2019 | 4,88 | 1,64 | 3,29 | 15,25 | 0,11 | 25,16 | 41,57 | 5 |
| TT194 | 2019 | 4,18 | 1,48 | 3,04 | 12,77 | 0,09 | 21,58 | 44,94 | 5 |
| TT195 | 2019 | 5,48 | 2,14 | 3,96 | 19,97 | 0,12 | 31,67 | 37,31 | 2 |
| TT196 | 2019 | 4,48 | 1,66 | 3,62 | 16,74 | 0,14 | 26,64 | 41,55 | 2 |
| TT197 | 2019 | 4,82 | 2,28 | 3,13 | 20,92 | 0,10 | 31,26 | 38,18 | 2 |
| TT198 | 2019 | 5,94 | 2,20 | 4,10 | 21,03 | 0,15 | 33,42 | 36,41 | 2 |
| TT199 | 2019 | 5,00 | 1,38 | 3,72 | 17,40 | 0,12 | 27,61 | 40,87 | 4 |
| TT200 | 2019 | 4,85 | 1,49 | 3,35 | 13,36 | 0,09 | 23,15 | 41,20 | 5 |
| TT201 | 2019 | 4,27 | 1,39 | 2,69 | 14,80 | 0,12 | 23,28 | 44,52 | 5 |
| TT202 | 2019 | 4,34 | 1,93 | 3,51 | 16,39 | 0,10 | 26,27 | 33,87 | 2 |
| TT203 | 2019 | 4,35 | 1,50 | 3,50 | 14,45 | 0,10 | 23,90 | 38,89 | 2 |
| TT204 | 2019 | 4,44 | 1,80 | 3,25 | 15,96 | 0,10 | 25,54 | 40,25 | 2 |
| TT205 | 2019 | 4,51 | 2,30 | 3,12 | 16,38 | 0,13 | 26,44 | 35,07 | 2 |
| TT206 | 2019 | 5,58 | 3,34 | 3,44 | 25,52 | 0,13 | 38,01 | 32,90 | 1 |
| TT207 | 2019 | 4,46 | 1,59 | 2,99 | 12,94 | 0,08 | 22,07 | 47,70 | 5 |
| TT208 | 2019 | 4,35 | 2,37 | 2,80 | 22,74 | 0,10 | 32,36 | 38,99 | 3 |
| TT209 | 2019 | 4,52 | 1,86 | 3,74 | 14,51 | 0,11 | 24,74 | 33,34 | 2 |
| TT210 | 2019 | 4,64 | 1,74 | 3,60 | 16,52 | 0,11 | 26,62 | 45,27 | 5 |
| TT211 | 2019 | 4,10 | 1,02 | 2,73 | 10,71 | 0,08 | 18,65 | 47,94 | 5 |
| TT212 | 2019 | 4,00 | 2,02 | 2,40 | 14,78 | 0,08 | 23,27 | 33,31 | 2 |
| TT213 | 2019 | 6,65 | 2,92 | 4,59 | 20,92 | 0,17 | 35,24 | 26,90 | 1 |
| TT214 | 2019 | 4,94 | 1,77 | 3,94 | 18,67 | 0,11 | 29,43 | 41,25 | 4 |
| TT215 | 2019 | 4,89 | 2,15 | 3,24 | 15,63 | 0,10 | 26,02 | 37,83 | 2 |
| TT216 | 2019 | 4,47 | 2,18 | 3,21 | 19,01 | 0,19 | 29,06 | 35,22 | 2 |
| TT217 | 2019 | 3,96 | 1,44 | 3,02 | 15,33 | 0,13 | 23,87 | 42,58 | 5 |
| TT218 | 2019 | 4,86 | 1,75 | 3,28 | 16,48 | 0,11 | 26,49 | 45,17 | 4 |
| TT219 | 2019 | 5,79 | 1,94 | 3,64 | 20,07 | 0,10 | 31,54 | 39,77 | 3 |
| TT220 | 2019 | 5,79 | 2,19 | 4,23 | 16,93 | 0,13 | 29,28 | 30,26 | 2 |
| TT221 | 2019 | 4,81 | 2,13 | 3,30 | 16,41 | 0,11 | 26,77 | 39,97 | 4 |
| TT222 | 2019 | 4,71 | 2,70 | 3,03 | 18,01 | 0,10 | 28,55 | 35,35 | 2 |

|       |      |       |      |      |       |      |       |       |   |
|-------|------|-------|------|------|-------|------|-------|-------|---|
| TT223 | 2019 | 3,83  | 1,01 | 2,39 | 10,51 | 0,07 | 17,82 | 49,52 | 5 |
| TT224 | 2019 | 4,20  | 2,04 | 3,21 | 18,68 | 0,10 | 28,24 | 36,71 | 2 |
| TT225 | 2019 | 4,32  | 1,63 | 3,12 | 13,22 | 0,08 | 22,37 | 39,74 | 2 |
| TT226 | 2019 | 3,30  | 1,50 | 2,05 | 12,98 | 0,08 | 19,90 | 34,29 | 2 |
| TT227 | 2019 | 3,85  | 2,32 | 3,08 | 22,75 | 0,11 | 32,11 | 35,44 | 1 |
| TT228 | 2019 | 3,67  | 1,40 | 2,66 | 10,73 | 0,10 | 18,57 | 48,25 | 5 |
| TT1   | 2014 | 8,04  | 4,79 | 3,00 | 16,45 | 0,05 | 32,34 | 36,02 | 1 |
| TT2   | 2014 | 6,74  | 3,40 | 2,59 | 14,96 | 0,06 | 27,75 | 37,27 | 1 |
| TT3   | 2014 | 8,11  | 4,06 | 3,53 | 19,12 | 0,05 | 34,87 | 43,72 | 1 |
| TT4   | 2014 | 10,05 | 3,31 | 3,16 | 13,76 | 0,06 | 30,34 | 47,29 | 3 |
| TT5   | 2014 | 6,29  | 3,46 | 2,72 | 13,57 | 0,05 | 26,09 | 47,66 | 3 |
| TT6   | 2014 | 5,35  | 3,63 | 1,50 | 16,62 | 0,03 | 27,13 | 43,19 | 1 |
| TT7   | 2014 | 8,32  | 4,09 | 2,72 | 15,83 | 0,04 | 31,00 | 49,92 | 3 |
| TT8   | 2014 | 8,52  | 4,03 | 2,68 | 18,00 | 0,06 | 33,28 | 47,75 | 3 |
| TT9   | 2014 | 5,89  | 3,91 | 2,35 | 16,37 | 0,07 | 28,58 | 40,65 | 2 |
| TT10  | 2014 | 7,96  | 3,00 | 2,52 | 13,39 | 0,08 | 26,96 | 47,74 | 4 |
| TT11  | 2014 | 8,25  | 2,98 | 3,33 | 13,89 | 0,09 | 28,53 | 46,51 | 4 |
| TT12  | 2014 | 8,34  | 4,07 | 3,04 | 17,03 | 0,10 | 32,58 | 44,67 | 1 |
| TT13  | 2014 | 6,70  | 3,33 | 2,19 | 13,85 | 0,08 | 26,15 | 51,69 | 4 |
| TT14  | 2014 | 6,41  | 2,92 | 2,24 | 8,55  | 0,05 | 20,17 | 57,23 | 5 |
| TT15  | 2014 | 8,44  | 3,47 | 3,35 | 16,24 | 0,07 | 31,57 | 40,09 | 1 |
| TT16  | 2014 | 6,62  | 3,55 | 2,32 | 15,87 | 0,06 | 28,43 | 52,31 | 3 |
| TT17  | 2014 | 6,86  | 2,80 | 2,60 | 13,24 | 0,06 | 25,56 | 50,57 | 4 |
| TT18  | 2014 | 5,12  | 3,04 | 2,61 | 13,07 | 0,04 | 23,88 | 45,37 | 2 |
| TT19  | 2014 | 7,27  | 2,89 | 2,37 | 13,42 | 0,06 | 26,01 | 52,16 | 4 |
| TT20  | 2014 | 7,50  | 3,45 | 3,27 | 15,52 | 0,08 | 29,82 | 49,73 | 3 |
| TT21  | 2014 | 7,49  | 4,16 | 2,92 | 18,30 | 0,06 | 32,93 | 34,33 | 1 |
| TT22  | 2014 | 7,96  | 3,88 | 2,33 | 15,04 | 0,08 | 29,29 | 48,69 | 3 |
| TT23  | 2014 | 5,38  | 2,71 | 2,01 | 13,97 | 0,06 | 24,12 | 50,16 | 4 |
| TT24  | 2014 | 7,13  | 3,58 | 2,20 | 15,37 | 0,08 | 28,36 | 47,43 | 3 |
| TT25  | 2014 | 8,40  | 2,88 | 2,90 | 12,50 | 0,07 | 26,74 | 43,93 | 4 |
| TT26  | 2014 | 7,28  | 4,12 | 2,98 | 17,68 | 0,07 | 32,13 | 45,16 | 3 |
| TT27  | 2014 | 6,75  | 3,97 | 2,97 | 16,12 | 0,00 | 29,82 | 42,79 | 3 |
| TT28  | 2014 | 7,63  | 3,11 | 2,75 | 15,29 | 0,04 | 28,81 | 45,63 | 3 |
| TT29  | 2014 | 6,26  | 3,97 | 2,51 | 17,96 | 0,12 | 30,82 | 35,04 | 1 |
| TT30  | 2014 | 8,03  | 3,58 | 2,41 | 12,63 | 0,08 | 26,72 | 57,71 | 4 |
| TT31  | 2014 | 6,22  | 3,21 | 2,01 | 10,94 | 0,00 | 22,38 | 54,41 | 5 |
| TT32  | 2014 | 8,10  | 3,96 | 2,99 | 17,11 | 0,08 | 32,26 | 41,51 | 1 |
| TT33  | 2014 | 6,05  | 3,32 | 2,96 | 15,04 | 0,14 | 27,51 | 39,08 | 1 |
| TT34  | 2014 | 6,82  | 2,63 | 1,87 | 8,92  | 0,07 | 20,30 | 54,14 | 5 |
| TT35  | 2014 | 3,91  | 2,30 | 1,72 | 14,39 | 0,12 | 22,44 | 48,06 | 3 |
| TT36  | 2014 | 5,36  | 2,89 | 2,34 | 11,69 | 0,06 | 22,33 | 47,10 | 4 |
| TT37  | 2014 | 3,68  | 1,75 | 1,62 | 8,86  | 0,16 | 16,07 | 50,08 | 5 |
| TT38  | 2014 | 5,82  | 3,07 | 1,90 | 13,46 | 0,07 | 24,32 | 49,28 | 4 |
| TT39  | 2014 | 7,72  | 4,26 | 3,21 | 18,45 | 0,09 | 33,74 | 41,77 | 1 |
| TT40  | 2014 | 6,13  | 3,80 | 2,69 | 13,20 | 0,10 | 25,92 | 38,32 | 1 |

|      |      |      |      |      |       |      |       |       |   |
|------|------|------|------|------|-------|------|-------|-------|---|
| TT41 | 2014 | 6,26 | 3,21 | 2,72 | 14,27 | 0,08 | 26,55 | 49,49 | 3 |
| TT42 | 2014 | 3,95 | 2,81 | 1,48 | 11,02 | 0,07 | 19,33 | 44,88 | 2 |
| TT43 | 2014 | 7,80 | 2,65 | 2,89 | 11,18 | 0,10 | 24,61 | 54,39 | 4 |
| TT44 | 2014 | 6,66 | 2,92 | 2,29 | 12,55 | 0,07 | 24,49 | 52,39 | 4 |
| TT45 | 2014 | 6,73 | 3,39 | 2,32 | 15,00 | 0,07 | 27,50 | 44,01 | 1 |
| TT46 | 2014 | 7,57 | 3,25 | 2,16 | 12,63 | 0,07 | 25,68 | 51,17 | 4 |
| TT47 | 2014 | 4,94 | 2,62 | 1,92 | 10,84 | 0,06 | 20,39 | 55,13 | 4 |
| TT48 | 2014 | 6,20 | 3,53 | 2,25 | 18,34 | 0,05 | 30,38 | 42,75 | 1 |
| TT49 | 2014 | 6,32 | 4,12 | 2,51 | 15,95 | 0,05 | 28,95 | 35,22 | 1 |
| TT50 | 2014 | 5,43 | 2,66 | 2,47 | 13,77 | 0,06 | 24,40 | 45,40 | 3 |
| TT51 | 2014 | 5,31 | 3,33 | 2,03 | 17,26 | 0,07 | 28,00 | 40,66 | 1 |
| TT52 | 2014 | 7,56 | 2,86 | 2,57 | 9,36  | 0,09 | 22,44 | 51,27 | 4 |
| TT53 | 2014 | 6,31 | 2,85 | 2,27 | 14,20 | 0,06 | 25,69 | 42,18 | 2 |
| TT54 | 2014 | 9,34 | 2,92 | 3,18 | 16,48 | 0,06 | 31,98 | 51,13 | 3 |
| TT55 | 2014 | 6,46 | 2,63 | 2,47 | 14,03 | 0,05 | 25,65 | 47,70 | 3 |
| TT56 | 2014 | 7,14 | 2,76 | 2,55 | 13,29 | 0,06 | 25,81 | 50,18 | 4 |
| TT57 | 2014 | 6,05 | 3,07 | 2,47 | 15,02 | 0,06 | 26,67 | 50,49 | 4 |
| TT58 | 2014 | 5,65 | 2,76 | 2,42 | 15,37 | 0,10 | 26,30 | 42,92 | 3 |
| TT59 | 2014 | 6,09 | 2,84 | 2,34 | 9,70  | 0,08 | 21,04 | 52,04 | 5 |
| TT60 | 2014 | 8,00 | 3,76 | 2,79 | 14,57 | 0,06 | 29,17 | 56,48 | 4 |
| TT61 | 2014 | 8,06 | 3,39 | 2,72 | 14,36 | 0,07 | 28,60 | 42,42 | 3 |
| TT62 | 2014 | 7,36 | 2,86 | 2,74 | 14,14 | 0,06 | 27,16 | 52,81 | 4 |
| TT63 | 2014 | 5,43 | 3,18 | 2,04 | 12,70 | 0,05 | 23,41 | 42,37 | 2 |
| TT64 | 2014 | 7,55 | 2,78 | 2,83 | 13,21 | 0,06 | 26,42 | 49,86 | 4 |
| TT65 | 2014 | 6,95 | 2,91 | 3,23 | 12,76 | 0,07 | 25,93 | 44,74 | 4 |
| TT66 | 2014 | 6,11 | 2,54 | 2,30 | 10,59 | 0,08 | 21,61 | 42,69 | 2 |
| TT67 | 2014 | 5,90 | 3,07 | 2,09 | 15,49 | 0,05 | 26,60 | 47,19 | 4 |
| TT68 | 2014 | 4,70 | 2,38 | 2,19 | 13,24 | 0,12 | 22,64 | 46,65 | 4 |
| TT69 | 2014 | 5,96 | 2,41 | 2,16 | 13,76 | 0,05 | 24,35 | 41,29 | 2 |
| TT70 | 2014 | 7,14 | 3,09 | 2,42 | 9,99  | 0,07 | 22,70 | 48,53 | 4 |
| TT71 | 2014 | 5,47 | 2,80 | 1,96 | 13,72 | 0,06 | 23,99 | 51,21 | 4 |
| TT72 | 2014 | 5,37 | 1,84 | 2,30 | 9,10  | 0,09 | 18,71 | 53,76 | 5 |
| TT73 | 2014 | 7,48 | 3,08 | 2,59 | 16,11 | 0,06 | 29,32 | 51,27 | 3 |
| TT74 | 2014 | 5,70 | 2,82 | 2,15 | 11,51 | 0,06 | 22,24 | 53,92 | 4 |
| TT75 | 2014 | 7,88 | 2,79 | 2,91 | 14,18 | 0,07 | 27,83 | 47,32 | 3 |
| TT76 | 2014 | 6,37 | 2,60 | 2,19 | 12,86 | 0,06 | 24,08 | 39,75 | 1 |
| TT77 | 2014 | 4,95 | 2,31 | 2,42 | 13,74 | 0,12 | 23,55 | 44,24 | 3 |
| TT78 | 2014 | 5,48 | 3,11 | 2,22 | 15,33 | 0,07 | 26,21 | 39,64 | 1 |
| TT79 | 2014 | 6,46 | 3,59 | 2,91 | 12,01 | 0,09 | 25,07 | 38,59 | 3 |
| TT80 | 2014 | 5,93 | 2,55 | 2,15 | 13,16 | 0,10 | 23,90 | 44,39 | 3 |
| TT81 | 2014 | 6,53 | 2,32 | 2,27 | 13,55 | 0,06 | 24,73 | 48,10 | 3 |
| TT82 | 2014 | 7,06 | 3,59 | 2,81 | 13,79 | 0,06 | 27,31 | 49,00 | 3 |
| TT83 | 2014 | 6,31 | 2,52 | 2,52 | 11,13 | 0,10 | 22,58 | 47,43 | 4 |
| TT84 | 2014 | 8,11 | 2,83 | 2,86 | 11,48 | 0,09 | 25,36 | 44,57 | 3 |
| TT85 | 2014 | 8,77 | 3,19 | 2,83 | 15,55 | 0,07 | 30,41 | 43,32 | 3 |
| TT86 | 2014 | 8,83 | 3,04 | 3,02 | 14,63 | 0,09 | 29,61 | 40,08 | 2 |



|       |      |      |      |      |       |      |       |       |   |
|-------|------|------|------|------|-------|------|-------|-------|---|
| TT87  | 2014 | 7,17 | 3,44 | 2,68 | 16,05 | 0,09 | 29,43 | 35,45 | 1 |
| TT88  | 2014 | 5,50 | 2,75 | 2,40 | 12,98 | 0,07 | 23,70 | 35,42 | 1 |
| TT89  | 2014 | 6,44 | 3,09 | 2,42 | 14,14 | 0,11 | 26,20 | 49,79 | 4 |
| TT90  | 2014 | 5,04 | 2,40 | 2,24 | 12,74 | 0,09 | 22,52 | 51,48 | 4 |
| TT91  | 2014 | 5,70 | 3,31 | 2,35 | 15,11 | 0,13 | 26,60 | 37,37 | 1 |
| TT92  | 2014 | 6,35 | 2,85 | 2,15 | 12,72 | 0,07 | 24,15 | 41,94 | 4 |
| TT93  | 2014 | 8,16 | 3,33 | 2,91 | 15,95 | 0,10 | 30,46 | 43,80 | 3 |
| TT94  | 2014 | 7,89 | 2,65 | 2,74 | 12,42 | 0,11 | 25,81 | 50,50 | 4 |
| TT95  | 2014 | 4,20 | 1,99 | 1,63 | 10,28 | 0,05 | 18,15 | 45,05 | 4 |
| TT96  | 2014 | 6,38 | 2,54 | 2,55 | 10,73 | 0,10 | 22,30 | 56,57 | 5 |
| TT97  | 2014 | 8,97 | 3,03 | 3,34 | 14,78 | 0,11 | 30,23 | 47,25 | 3 |
| TT98  | 2014 | 4,79 | 2,15 | 2,12 | 9,53  | 0,10 | 18,69 | 53,75 | 5 |
| TT99  | 2014 | 5,91 | 2,55 | 2,24 | 12,82 | 0,10 | 23,62 | 47,08 | 4 |
| TT100 | 2014 | 7,48 | 3,44 | 3,24 | 16,46 | 0,14 | 30,77 | 33,53 | 2 |
| TT101 | 2014 | 7,76 | 3,67 | 3,17 | 14,18 | 0,11 | 28,89 | 39,24 | 2 |
| TT102 | 2014 | 5,07 | 2,46 | 2,06 | 11,66 | 0,10 | 21,35 | 45,24 | 5 |
| TT103 | 2014 | 6,70 | 3,04 | 2,53 | 12,83 | 0,12 | 25,22 | 45,60 | 2 |
| TT104 | 2014 | 5,63 | 2,60 | 2,80 | 12,75 | 0,11 | 23,88 | 36,64 | 2 |
| TT105 | 2014 | 6,38 | 3,23 | 2,59 | 15,00 | 0,16 | 27,36 | 40,59 | 2 |
| TT106 | 2014 | 4,10 | 2,29 | 1,84 | 13,32 | 0,10 | 21,65 | 37,97 | 2 |
| TT107 | 2014 | 2,99 | 3,29 | 2,19 | 13,05 | 0,13 | 21,65 | 52,62 | 4 |
| TT108 | 2014 | 4,13 | 3,93 | 3,31 | 14,56 | 0,19 | 26,13 | 45,39 | 4 |
| TT109 | 2014 | 3,67 | 2,82 | 2,32 | 12,08 | 0,08 | 20,96 | 50,27 | 5 |
| TT110 | 2014 | 3,47 | 3,26 | 2,38 | 14,90 | 0,10 | 24,11 | 46,47 | 4 |
| TT111 | 2014 | 5,43 | 2,30 | 2,58 | 14,91 | 0,09 | 25,32 | 44,56 | 2 |
| TT112 | 2014 | 2,88 | 2,41 | 2,68 | 14,37 | 0,09 | 22,42 | 45,82 | 2 |
| TT113 | 2014 | 3,26 | 2,65 | 2,58 | 12,30 | 0,10 | 20,89 | 48,97 | 4 |
| TT115 | 2014 | 2,89 | 2,66 | 2,25 | 12,34 | 0,09 | 20,24 | 44,87 | 2 |
| TT116 | 2014 | 3,55 | 3,17 | 3,22 | 13,65 | 0,10 | 23,70 | 44,46 | 4 |
| TT117 | 2014 | 3,08 | 3,10 | 2,92 | 14,09 | 0,40 | 23,59 | 44,25 | 2 |
| TT118 | 2014 | 3,57 | 3,08 | 2,32 | 13,02 | 0,41 | 22,40 | 47,12 | 2 |
| TT119 | 2014 | 4,04 | 2,10 | 2,24 | 9,77  | 0,09 | 18,24 | 38,99 | 2 |
| TT120 | 2014 | 3,12 | 2,55 | 2,69 | 13,59 | 0,10 | 22,05 | 47,86 | 2 |
| TT121 | 2014 | 2,88 | 2,88 | 2,06 | 12,35 | 0,07 | 20,23 | 49,96 | 5 |
| TT122 | 2014 | 3,24 | 3,53 | 2,86 | 16,17 | 0,13 | 25,94 | 36,34 | 1 |
| TT123 | 2014 | 2,78 | 2,48 | 2,34 | 11,02 | 0,07 | 18,69 | 50,16 | 5 |
| TT124 | 2014 | 3,04 | 2,59 | 2,35 | 12,15 | 0,07 | 20,20 | 52,12 | 5 |
| TT125 | 2014 | 2,83 | 3,40 | 2,40 | 14,37 | 0,08 | 23,08 | 40,27 | 2 |
| TT126 | 2014 | 2,33 | 1,50 | 2,07 | 8,72  | 0,10 | 14,71 | 39,14 | 2 |
| TT127 | 2014 | 3,17 | 2,59 | 2,09 | 10,11 | 0,07 | 18,01 | 57,72 | 5 |
| TT128 | 2014 | 5,45 | 2,84 | 2,14 | 13,99 | 0,09 | 24,52 | 44,60 | 2 |
| TT129 | 2014 | 2,88 | 2,50 | 1,79 | 10,82 | 0,06 | 18,05 | 58,52 | 5 |
| TT130 | 2014 | 2,50 | 2,46 | 2,02 | 11,05 | 0,09 | 18,11 | 42,08 | 2 |
| TT131 | 2014 | 1,79 | 2,23 | 0,80 | 9,72  | 0,08 | 14,62 | 37,65 | 2 |
| TT132 | 2014 | 3,03 | 3,35 | 2,74 | 14,62 | 0,10 | 23,83 | 43,88 | 2 |
| TT133 | 2014 | 2,86 | 2,52 | 1,90 | 10,37 | 0,09 | 17,74 | 50,25 | 5 |

|       |      |      |      |      |       |      |       |       |   |
|-------|------|------|------|------|-------|------|-------|-------|---|
| TT134 | 2014 | 1,68 | 2,20 | 1,95 | 9,30  | 0,09 | 15,23 | 45,39 | 2 |
| TT135 | 2014 | 1,71 | 2,94 | 2,20 | 13,78 | 0,10 | 20,73 | 51,92 | 2 |
| TT136 | 2014 | 2,06 | 3,07 | 2,34 | 12,97 | 0,12 | 20,57 | 49,96 | 4 |
| TT137 | 2014 | 1,76 | 2,96 | 2,25 | 13,57 | 0,05 | 20,58 | 56,96 | 2 |
| TT138 | 2014 | 1,38 | 2,45 | 2,08 | 12,98 | 0,05 | 18,94 | 50,43 | 2 |
| TT139 | 2014 | 1,53 | 1,85 | 1,98 | 9,52  | 0,05 | 14,94 | 50,49 | 5 |
| TT140 | 2014 | 2,10 | 2,61 | 2,88 | 12,78 | 0,08 | 20,44 | 46,26 | 4 |
| TT141 | 2014 | 1,70 | 2,19 | 2,52 | 11,13 | 0,04 | 17,58 | 43,64 | 2 |
| TT142 | 2014 | 1,68 | 2,35 | 1,89 | 9,25  | 0,05 | 15,22 | 55,69 | 5 |
| TT143 | 2014 | 1,62 | 2,14 | 1,86 | 13,03 | 0,06 | 18,70 | 52,13 | 5 |
| TT144 | 2014 | 2,30 | 2,87 | 2,52 | 12,96 | 0,04 | 20,68 | 56,21 | 5 |
| TT145 | 2014 | 2,00 | 2,00 | 1,87 | 9,60  | 0,03 | 15,50 | 50,50 | 5 |
| TT146 | 2014 | 1,72 | 2,46 | 1,74 | 10,51 | 0,03 | 16,45 | 57,55 | 5 |
| TT147 | 2014 | 6,83 | 3,66 | 3,10 | 15,15 | 0,05 | 28,80 | 41,01 | 2 |
| TT148 | 2014 | 7,08 | 2,66 | 2,93 | 12,90 | 0,07 | 25,64 | 53,78 | 5 |
| TT149 | 2014 | 7,02 | 3,07 | 2,39 | 13,17 | 0,66 | 26,31 | 51,20 | 5 |
| TT150 | 2014 | 5,37 | 2,66 | 1,88 | 14,33 | 0,62 | 24,86 | 39,39 | 5 |
| TT151 | 2014 | 6,18 | 2,58 | 2,63 | 10,98 | 0,50 | 22,86 | 47,35 | 2 |
| TT152 | 2014 | 6,03 | 1,82 | 2,47 | 10,61 | 0,52 | 21,44 | 52,49 | 4 |
| TT153 | 2014 | 4,31 | 2,78 | 1,59 | 14,23 | 0,43 | 23,35 | 52,10 | 4 |
| TT154 | 2014 | 5,48 | 2,56 | 2,53 | 11,80 | 0,44 | 22,81 | 49,04 | 4 |
| TT155 | 2014 | 5,63 | 2,95 | 2,23 | 13,89 | 0,76 | 25,45 | 40,88 | 2 |
| TT156 | 2014 | 7,78 | 3,84 | 2,40 | 15,00 | 1,14 | 30,17 | 46,84 | 4 |
| TT157 | 2014 | 5,58 | 2,55 | 2,02 | 11,59 | 0,81 | 22,55 | 50,18 | 4 |
| TT158 | 2014 | 3,63 | 1,73 | 1,42 | 8,94  | 0,75 | 16,46 | 52,18 | 5 |
| TT159 | 2014 | 6,72 | 2,88 | 2,37 | 13,40 | 0,75 | 26,12 | 50,98 | 4 |
| TT160 | 2014 | 5,09 | 2,66 | 1,78 | 12,03 | 0,73 | 22,28 | 46,76 | 2 |
| TT161 | 2014 | 5,61 | 2,15 | 2,31 | 10,38 | 0,64 | 21,10 | 56,07 | 4 |
| TT162 | 2014 | 5,14 | 2,34 | 1,94 | 12,05 | 0,67 | 22,14 | 43,08 | 2 |
| TT163 | 2014 | 4,40 | 2,58 | 1,88 | 9,84  | 1,28 | 19,98 | 40,95 | 2 |
| TT164 | 2014 | 4,85 | 2,44 | 1,77 | 11,64 | 0,78 | 21,47 | 51,73 | 5 |
| TT165 | 2014 | 5,71 | 2,74 | 2,31 | 11,70 | 1,05 | 23,50 | 53,92 | 4 |
| TT166 | 2014 | 4,73 | 3,09 | 1,43 | 13,89 | 0,89 | 24,03 | 40,13 | 2 |
| TT167 | 2014 | 5,80 | 3,17 | 2,48 | 14,19 | 1,03 | 26,67 | 38,84 | 1 |
| TT168 | 2014 | 4,97 | 2,64 | 2,19 | 12,95 | 0,96 | 23,71 | 45,64 | 2 |
| TT169 | 2014 | 6,11 | 2,62 | 2,20 | 12,79 | 0,93 | 24,65 | 47,06 | 4 |
| TT170 | 2014 | 4,97 | 2,01 | 1,77 | 8,59  | 0,75 | 18,09 | 57,36 | 5 |
| TT171 | 2014 | 5,54 | 2,78 | 2,12 | 16,49 | 0,77 | 27,69 | 44,02 | 2 |
| TT172 | 2014 | 5,78 | 2,61 | 2,87 | 11,99 | 0,74 | 24,00 | 25,97 | 2 |
| TT173 | 2014 | 6,23 | 2,68 | 1,74 | 10,88 | 0,92 | 22,45 | 50,20 | 5 |
| TT174 | 2014 | 6,39 | 3,60 | 2,21 | 15,14 | 0,87 | 28,20 | 37,88 | 1 |
| TT175 | 2014 | 7,36 | 2,58 | 2,41 | 8,86  | 0,86 | 22,07 | 56,18 | 5 |
| TT176 | 2014 | 7,55 | 2,83 | 2,47 | 11,64 | 0,92 | 25,42 | 53,32 | 5 |
| TT177 | 2014 | 6,09 | 2,35 | 2,35 | 11,37 | 0,88 | 23,04 | 52,34 | 5 |
| TT178 | 2014 | 6,63 | 2,62 | 2,68 | 14,28 | 0,85 | 27,07 | 47,93 | 4 |
| TT179 | 2014 | 7,17 | 3,56 | 2,33 | 13,60 | 0,90 | 27,56 | 42,95 | 2 |

|       |      |      |      |      |       |      |       |       |   |
|-------|------|------|------|------|-------|------|-------|-------|---|
| TT180 | 2014 | 7,28 | 3,04 | 2,25 | 12,45 | 0,89 | 25,90 | 52,18 | 5 |
| TT181 | 2014 | 6,75 | 2,94 | 2,40 | 11,16 | 0,91 | 24,16 | 56,05 | 5 |
| TT182 | 2014 | 5,88 | 3,35 | 2,54 | 15,32 | 0,79 | 27,88 | 37,77 | 1 |
| TT183 | 2014 | 7,12 | 3,13 | 2,37 | 11,87 | 1,17 | 25,67 | 50,85 | 4 |
| TT184 | 2014 | 6,75 | 2,90 | 2,07 | 11,02 | 1,01 | 23,76 | 49,48 | 5 |
| TT185 | 2014 | 8,83 | 3,14 | 3,76 | 13,60 | 1,26 | 30,59 | 45,53 | 4 |
| TT186 | 2014 | 7,46 | 3,09 | 2,75 | 15,23 | 1,02 | 29,55 | 56,43 | 4 |
| TT187 | 2014 | 7,43 | 3,72 | 2,76 | 15,49 | 1,29 | 30,69 | 41,89 | 2 |
| TT188 | 2014 | 6,48 | 2,66 | 2,74 | 13,78 | 1,17 | 26,81 | 48,99 | 4 |
| TT189 | 2014 | 5,73 | 2,92 | 2,25 | 12,54 | 1,26 | 24,70 | 47,02 | 4 |
| TT190 | 2014 | 4,62 | 2,60 | 2,25 | 13,80 | 1,11 | 24,39 | 42,97 | 2 |
| TT191 | 2014 | 3,99 | 2,66 | 1,80 | 11,85 | 1,14 | 21,44 | 42,98 | 2 |
| TT192 | 2014 | 6,12 | 2,76 | 2,20 | 12,05 | 1,01 | 24,14 | 46,53 | 2 |
| TT193 | 2014 | 6,00 | 2,43 | 2,02 | 10,77 | 1,02 | 22,25 | 50,37 | 5 |
| TT194 | 2014 | 4,86 | 2,18 | 1,87 | 10,11 | 0,92 | 19,94 | 52,78 | 5 |
| TT195 | 2014 | 4,85 | 2,10 | 2,31 | 12,07 | 0,93 | 22,27 | 44,76 | 2 |
| TT196 | 2014 | 5,72 | 2,85 | 2,57 | 13,15 | 1,09 | 25,37 | 44,77 | 2 |
| TT197 | 2014 | 4,59 | 3,26 | 1,63 | 13,81 | 0,98 | 24,27 | 46,28 | 2 |
| TT198 | 2014 | 4,92 | 2,31 | 1,92 | 11,41 | 0,92 | 21,48 | 43,21 | 2 |
| TT199 | 2014 | 4,72 | 1,90 | 2,15 | 12,31 | 0,96 | 22,04 | 51,59 | 4 |
| TT200 | 2014 | 6,15 | 2,17 | 2,53 | 10,06 | 1,06 | 21,96 | 49,08 | 5 |
| TT201 | 2014 | 5,27 | 2,12 | 2,09 | 11,43 | 1,03 | 21,93 | 50,94 | 5 |
| TT202 | 2014 | 6,25 | 3,29 | 2,88 | 13,62 | 1,07 | 27,11 | 37,96 | 2 |
| TT203 | 2014 | 5,31 | 2,56 | 2,61 | 11,06 | 0,99 | 22,53 | 42,93 | 2 |
| TT204 | 2014 | 5,00 | 2,69 | 2,16 | 11,79 | 0,89 | 22,52 | 43,42 | 2 |
| TT205 | 2014 | 4,02 | 2,46 | 1,75 | 11,07 | 0,88 | 20,18 | 40,05 | 2 |
| TT206 | 2014 | 5,09 | 3,83 | 2,14 | 17,83 | 1,39 | 30,28 | 40,37 | 1 |
| TT207 | 2014 | 5,49 | 2,43 | 1,96 | 9,92  | 1,27 | 21,08 | 55,31 | 5 |
| TT208 | 2014 | 4,94 | 3,18 | 2,03 | 17,73 | 1,35 | 29,24 | 45,11 | 3 |
| TT209 | 2014 | 4,78 | 2,50 | 2,70 | 13,69 | 0,08 | 23,74 | 42,89 | 2 |
| TT210 | 2014 | 3,10 | 1,60 | 2,29 | 12,17 | 0,07 | 19,24 | 52,17 | 5 |
| TT211 | 2014 | 6,23 | 2,28 | 2,43 | 11,98 | 0,07 | 22,98 | 52,08 | 5 |
| TT212 | 2014 | 1,76 | 1,15 | 1,38 | 9,32  | 0,08 | 13,69 | 38,25 | 2 |
| TT213 | 2014 | 7,20 | 3,71 | 3,30 | 14,76 | 0,11 | 29,09 | 32,71 | 1 |
| TT214 | 2014 | 5,91 | 2,89 | 3,31 | 16,46 | 0,09 | 28,66 | 47,67 | 4 |
| TT215 | 2014 | 7,17 | 3,36 | 2,51 | 12,96 | 0,09 | 26,09 | 43,47 | 2 |
| TT216 | 2014 | 4,74 | 2,67 | 2,35 | 12,88 | 0,07 | 22,71 | 39,78 | 2 |
| TT217 | 2014 | 4,58 | 2,41 | 2,31 | 13,21 | 0,08 | 22,59 | 52,05 | 5 |
| TT218 | 2014 | 6,03 | 3,17 | 2,57 | 13,34 | 0,07 | 25,19 | 54,30 | 4 |
| TT219 | 2014 | 8,21 | 2,71 | 2,82 | 14,71 | 0,08 | 28,52 | 44,33 | 3 |
| TT220 | 2014 | 5,53 | 3,05 | 2,98 | 13,43 | 0,10 | 25,09 | 35,07 | 2 |
| TT221 | 2014 | 5,84 | 2,88 | 2,10 | 14,26 | 0,11 | 25,19 | 49,65 | 4 |
| TT222 | 2014 | 5,87 | 3,20 | 2,24 | 13,42 | 0,11 | 24,84 | 42,40 | 2 |
| TT223 | 2014 | 6,01 | 2,18 | 2,33 | 10,99 | 0,08 | 21,60 | 52,55 | 5 |
| TT224 | 2014 | 6,03 | 3,45 | 2,69 | 16,48 | 0,12 | 28,77 | 43,55 | 2 |
| TT225 | 2014 | 6,97 | 3,03 | 2,99 | 12,56 | 0,11 | 25,66 | 42,62 | 2 |

|              |             |      |      |      |       |      |       |       |   |
|--------------|-------------|------|------|------|-------|------|-------|-------|---|
| <b>TT226</b> | <b>2014</b> | 4,34 | 2,89 | 1,52 | 8,71  | 0,14 | 17,60 | 36,10 | 2 |
| <b>TT227</b> | <b>2014</b> | 4,65 | 3,52 | 1,95 | 17,07 | 0,10 | 27,28 | 34,93 | 1 |
| <b>TT228</b> | <b>2014</b> | 7,50 | 3,72 | 3,04 | 14,37 | 0,13 | 28,76 | 48,54 | 5 |

|                   |  |              |             |             |              |             |              |              |  |
|-------------------|--|--------------|-------------|-------------|--------------|-------------|--------------|--------------|--|
| <b>min 2014</b>   |  | <b>1,38</b>  | <b>1,15</b> | <b>0,80</b> | <b>8,55</b>  | <b>0,00</b> | <b>13,69</b> | <b>25,97</b> |  |
| <b>min 2019</b>   |  | <b>3,30</b>  | <b>1,01</b> | <b>1,84</b> | <b>10,51</b> | <b>0,06</b> | <b>17,82</b> | <b>26,90</b> |  |
| <b>min total</b>  |  | <b>1,38</b>  | <b>1,01</b> | <b>0,80</b> | <b>8,55</b>  | <b>0,00</b> | <b>13,69</b> | <b>25,97</b> |  |
| <b>max 2014</b>   |  | <b>10,05</b> | <b>4,79</b> | <b>3,76</b> | <b>19,12</b> | <b>1,39</b> | <b>34,87</b> | <b>58,52</b> |  |
| <b>max 2019</b>   |  | <b>8,39</b>  | <b>3,88</b> | <b>5,64</b> | <b>28,94</b> | <b>0,43</b> | <b>45,18</b> | <b>53,47</b> |  |
| <b>max total</b>  |  | <b>10,05</b> | <b>4,79</b> | <b>5,64</b> | <b>28,94</b> | <b>1,39</b> | <b>45,18</b> | <b>58,52</b> |  |
| <b>mean 2014</b>  |  | <b>5,67</b>  | <b>2,91</b> | <b>2,40</b> | <b>13,19</b> | <b>0,31</b> | <b>24,48</b> | <b>46,47</b> |  |
| <b>mean 2019</b>  |  | <b>5,48</b>  | <b>2,16</b> | <b>3,75</b> | <b>19,07</b> | <b>0,15</b> | <b>30,61</b> | <b>40,44</b> |  |
| <b>mean total</b> |  | <b>5,58</b>  | <b>2,53</b> | <b>3,07</b> | <b>16,12</b> | <b>0,23</b> | <b>27,53</b> | <b>43,47</b> |  |
| <b>sd 2014</b>    |  | <b>1,82</b>  | <b>0,57</b> | <b>0,45</b> | <b>2,25</b>  | <b>0,39</b> | <b>4,12</b>  | <b>5,93</b>  |  |
| <b>sd 2019</b>    |  | <b>1,04</b>  | <b>0,56</b> | <b>0,75</b> | <b>4,13</b>  | <b>0,07</b> | <b>5,93</b>  | <b>5,39</b>  |  |
| <b>sd total</b>   |  | <b>1,49</b>  | <b>0,67</b> | <b>0,91</b> | <b>4,43</b>  | <b>0,29</b> | <b>5,94</b>  | <b>6,40</b>  |  |
